# Supplementary material
Source: PubMed Central journal article supplement (PMC3084056)
Supplement: 1014753108_pnas.1014753108_SI.pdf [file 1014753108_pnas.1014753108_SI.pdf]

# Supporting Information

Wang et al. 10.1073/pnas.1014753108

## SI Text

**Phage Display.** The random linear phage library ( $X_7$ ,  $X =$  random amino acid; diversity  $\sim 5 \times 10^8$ ) and individual phage (G7 and RPARPAR) were constructed with the T7-Select Phage Display System (EMD Biosciences). Phage were purified by precipitation with PEG-8000/NaCl (Sigma-Aldrich) followed by CsCl gradient ultracentrifugation and dialysis. For library screening and phage binding experiments, cultured cells were grown in cell culture slide chambers to nearly 90% confluence.

## Cell Recovery Experiments for Conventional Suspension Biopanning.

To investigate cell loss during centrifugation separation in conventional suspension biopanning, we subjected  $10^6$ ,  $10^5$ , and  $10^4$  suspended cells to different numbers of fixed-volume centrifuge washes (1 mL of DMEM + 1% BSA) ( $350 \times g$ , 5 min), with each combination performed in duplicate. The resulting cell pellets were resuspended in 1 mL of DMEM + 1% BSA, and cell number was determined by flow cytometry (Accuri C6 Flow Cytometer from Accuri Cytometers Inc.). Finally, cell recovery was calculated based on the initial sample size.

## Dissociation Constant ( $K_d$ ) Measurements of Biotinylated Peptides.

We quantified the  $K_d$  of several selected peptides against NRP-1 protein (R and D Systems) using an ELISA-based immunochemical method. Microtiter wells were coated with 50  $\mu$ L of 5  $\mu$ g/mL of purified NRP-1 protein overnight at 4  $^{\circ}$ C. After washing with PBST (PBS + 0.01% Tween 20), the wells were incubated for 1 h at room temperature with 50  $\mu$ L of various concentrations of biotinylated peptide in PBS. After washing with PBST, we added streptavidin-conjugated horseradish peroxidase (Vector Laboratories) to the wells and incubated for 30 min at room temperature. Horseradish peroxidase binding was quantified using 2,2-azino-bis (3-ethylbenzthiazoline-6-sulfonic acid) (Sigma) as a substrate. Using *Origin* (OriginLab), we obtained apparent dissociation constants ( $K_d$ ) for the peptide-NRP-1 interaction by fitting the dependence of the OD<sub>405</sub> value of specific binding on the concentration of peptides to the one-site binding saturation equation  $Y = B_{\max}X/(K_d + X)$ .

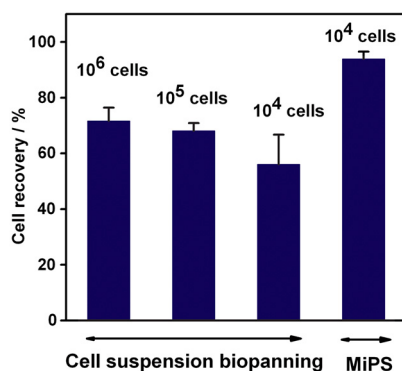

**Fig. S1.** MiPS chip selection enables high cell recovery even under highly stringent washing conditions. Recovery experiments were performed to count PPC-1 cells before and after the library binding and microfluidic continuous washing steps, and an average of 93.9% recovery was obtained for the MiPS assay over eight experiments. Four trials were performed, each consisting of a pair of slides from before and after library binding and continuous washing steps. For comparison, we performed conventional cell suspension biopanning with starting amounts of  $10^6$ ,  $10^5$ , and  $10^4$  cells in order to investigate cell loss during washing, and obtained average recovery of 71.7%, 68.1%, and 56.1%, respectively, after four fixed-volume washes.

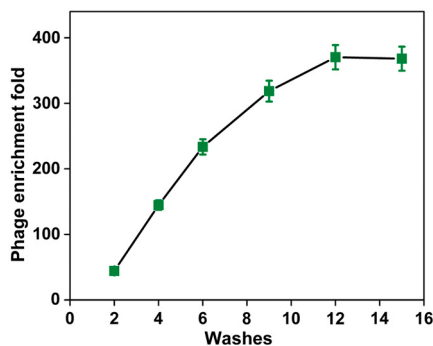

**Fig. S2.** We performed control biopanning experiments with 2, 4, 6, 9, 12, and 15 fixed-volume washes using Method A (static incubation, fixed-volume washing) and observed that RPARPAR enrichment reaches a plateau after 12 washes ( $\sim 300$ -fold enrichment). Further washing did not significantly improve enrichment.



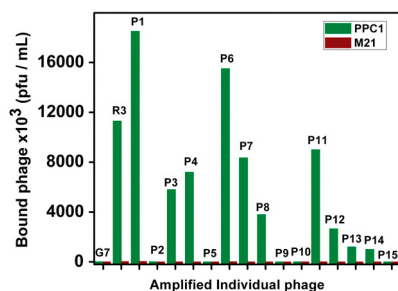

**Fig. S6.** Individual phage clones within the R3 pool showed strong specificity for PPC-1 cells. The binding data presented here clearly demonstrate that peptides containing R/KXXR motifs (P1, P3, P4, P6, P7, P8, P11, and P12) exhibit significantly stronger binding towards PPC-1 compared to those containing XXXR motifs (P2, P13, and P14); all 15 clones have minimal binding affinity for M21 cells. Sequences of individual clones are presented in Fig. 6.

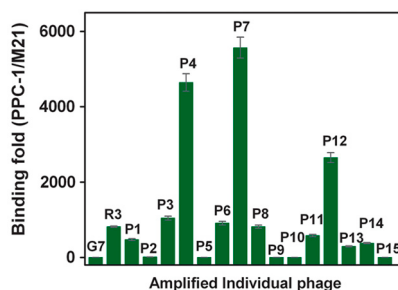

**Fig. S7.** Relative binding fold of the selected clones against PPC-1 cells relative to M21 cells. These experiments indicate that strongly binding CendR motif sequences (P1, P3, P4, P6, P7, P8, P11, and P12) exhibit high specificity for PPC-1 cells, while phage sequences with C-terminal arginine within XXXR motifs (P2, P13, and P14) achieve only moderate-to-weak binding. Notably, the different CendR motif-containing sequences show different levels of binding and specificity to PPC-1 cells over M21 cells.

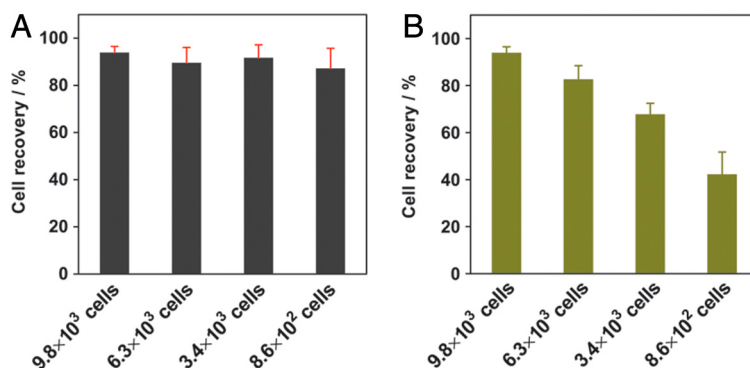

**Fig. S8.** The cell recovery of MiPS chip is high even when small number of cells are used. Smaller devices with a range of channel widths: 5 mm, 3.5 mm, 2 mm, and 0.5 mm were constructed to accommodate smaller number of cells,  $9.8 \times 10^3$ ,  $6.3 \times 10^3$ ,  $3.42 \times 10^3$ , and  $8.6 \times 10^2$  cells respectively. Recovery experiments were performed by counting PPC-1 cells before and after the library binding and microfluidic continuous washing steps. A) When the shear stress was kept constant (3 dyn/cm<sup>2</sup>) by adjusting the flow rates, an average recovery of 93.9%, 89.5%, 91.7%, 87.2% were obtained. B) Cell recovery decreases due to the increased shear stress if the flow rate was kept constant (1 mL/min), an average recovery of 93.9%, 82.5%, 67.7%, 42.2% were obtained. All experiments were performed in triplicate.

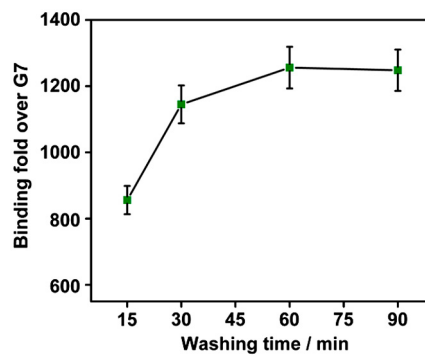

**Fig. S9.** Binding of RPARPAR phage relative to G7 control phage as a function of washing time in the MiPS chip with smaller channel ( $1.5 \text{ cm} \times 0.5 \text{ mm} \times 250 \text{ }\mu\text{m}$ ) which can accommodate  $\sim 1,000$  cells. The enrichment fold of RPARPAR over G7 increases monotonically with washing time until a plateau ( $\sim 1,200$ -fold) is reached after 60 min of continuous washing.
